# Supplementary material for: Differential biomolecular recognition by synthetic vs. biologically-derived components in the stone-forming process using 3D microfluidics
Source: Royal Society of Chemistry journal article supplement (doi:10.1039/d1tb01213d), 2021-10-27
Supplement: d1tb01213d1.pdf [file d1tb01213d1.pdf]

## Supporting Information

### Differential biomolecular recognition by synthetic vs. biologically derived components in stone-forming process using 3D microfluidics

Eugenia Awuah Boadi<sup>1</sup>, Samuel Shin<sup>1</sup>, Farai Gombedza<sup>1</sup>, and Bidhan C. Bandyopadhyay<sup>1,2,3\*</sup>

<sup>1</sup>Calcium Signaling Laboratory, Research Service, Veterans Affairs Medical Center, 50 Irving Street, NW, Washington DC, 20422

<sup>2</sup>Department of Biomedical Engineering, The Catholic University of America, 620 Michigan Avenue NE, Washington DC, 20064, USA.

<sup>3</sup>Division of Renal Diseases & Hypertension, Department of Medicine, The George Washington University, Washington DC, 20037 USA

\*E-mail: bidhan.bandyopadhyay@va.gov (Bidhan C. Bandyopadhyay)

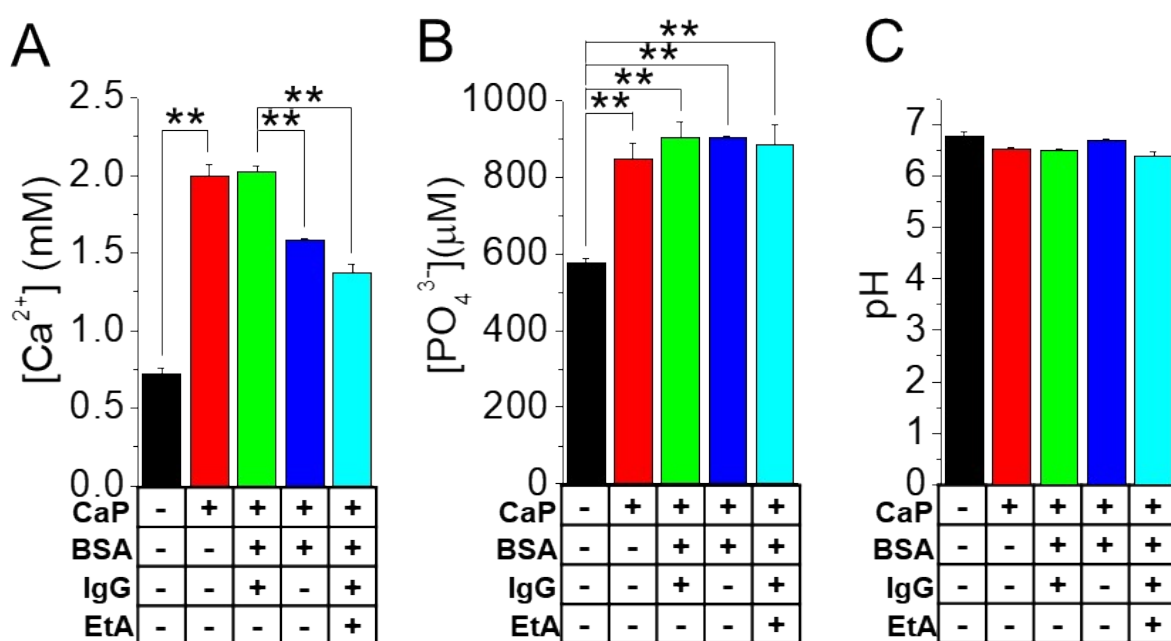

**Figure S1.** Microfluidic eluent solution electrolyte and pH measurements. Eluent measurements of **A.** Ca<sup>2+</sup>, **B.** PO<sub>4</sub><sup>3-</sup>, and **C.** pH measurements were performed after applying calcium phosphate (CaP), Bovine Serum Albumin (BSA), Immunoglobulin G (IgG), and/or Etidronic acid solutions in HK2 cell cultured microfluidic devices. Absence or presence of solution are indicated by – or +, respectively. Representative bar diagrams are in means + SD. \*\*, P<0.01.

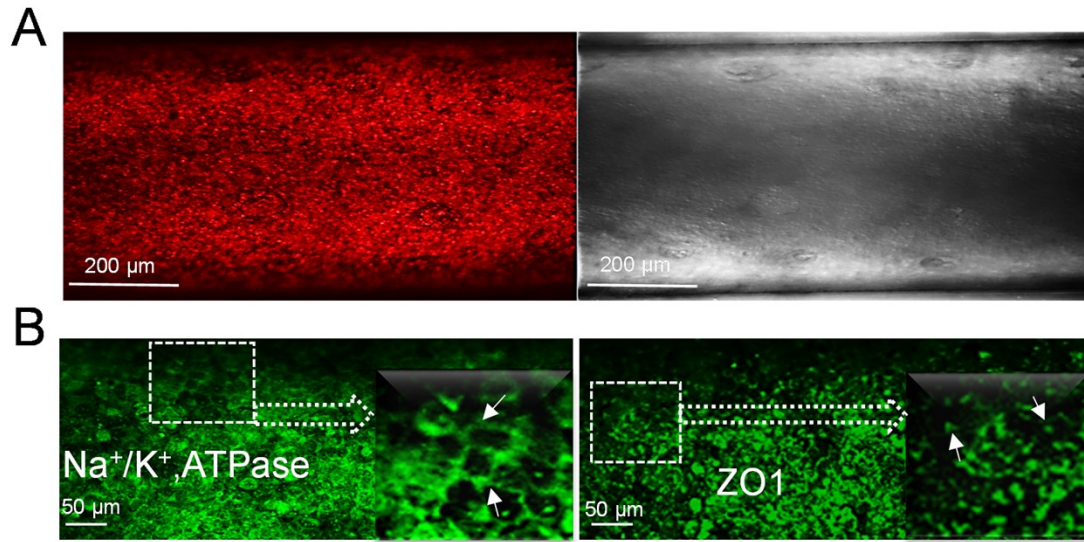

**Figure S2.** Representative confocal images of polarized HK2 cells cultured within the MF device of **A.** Propidium Iodide staining and corresponding DIC image, and **B.** Na<sup>+</sup>/K<sup>+</sup>-ATPase and ZO1 immunofluorescence labelling by staining with specific antibodies to those proteins as previously stated<sup>34</sup>. Insets images in **B** were magnified to show the spatial distributions of Na<sup>+</sup>/K<sup>+</sup>-ATPase and ZO1 proteins, ensuring the monolayer formation.

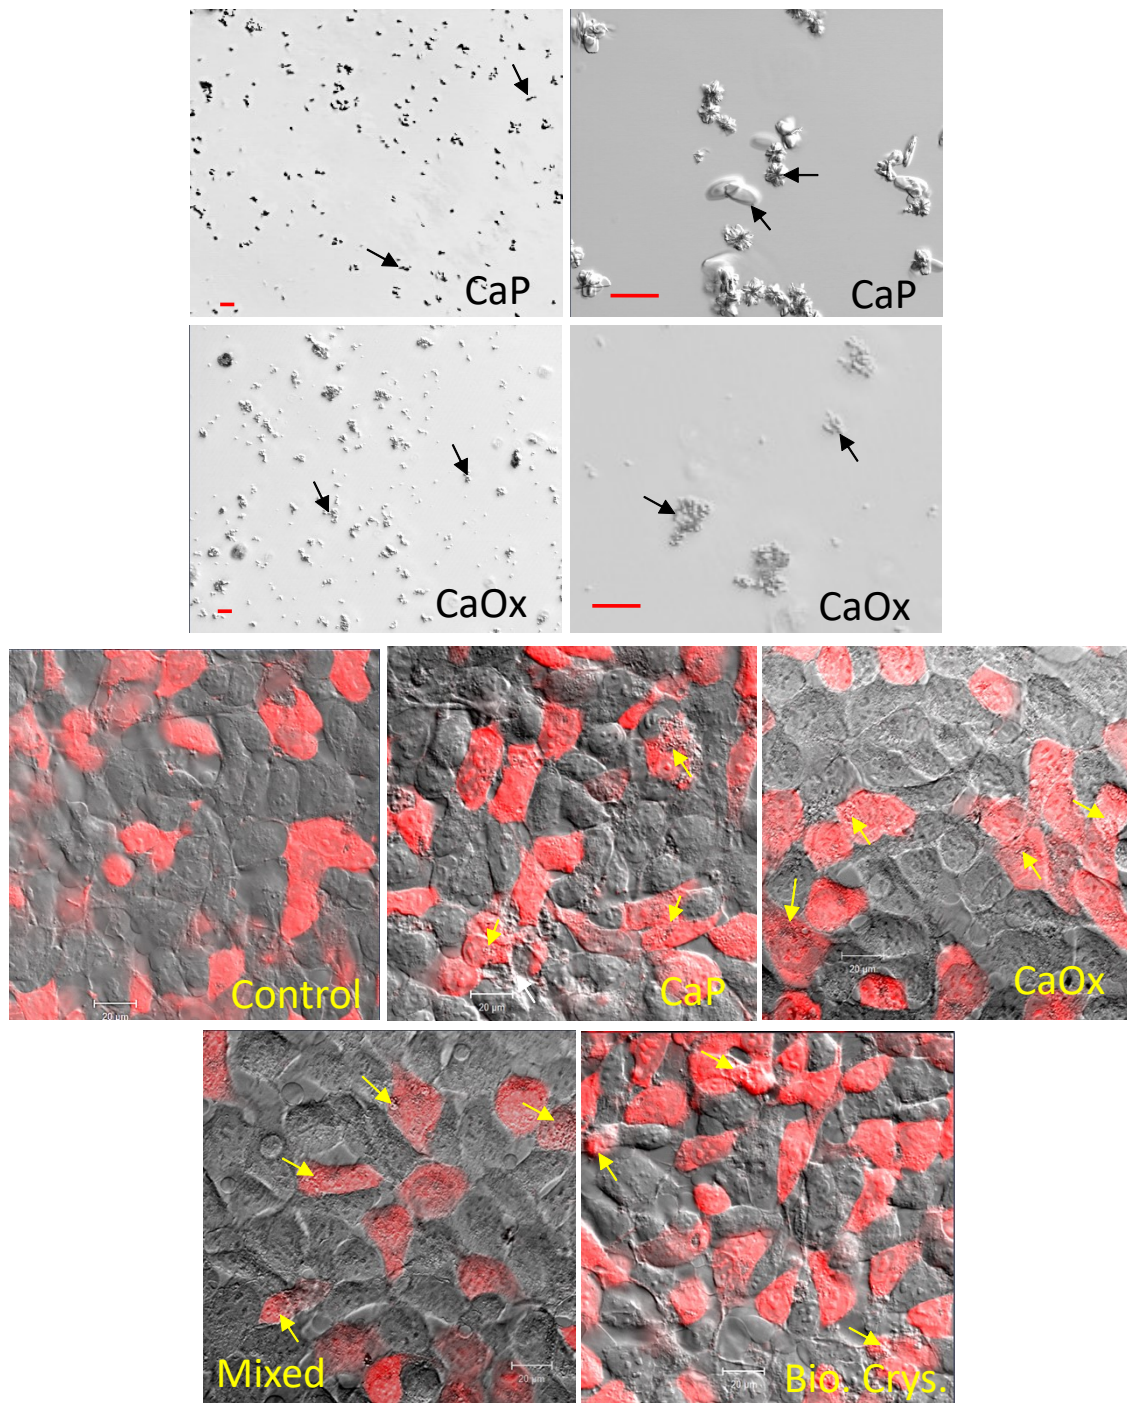

**Figure S3.** Crystal and cellular images were captured with representative confocal images. DIC images of **A.** calcium oxalate (CaOx) and **B.** calcium phosphate (CaP) synthetic crystals formed in 1x HBSS. Black arrows indicate respective crystals. Scale bars = 5  $\mu$ m. DIC images of cultured HK2 cellular monolayer in **C.** Control and **D.** CaP, CaOx and Mixed crystal internalized conditions were captured. Cultured HK2 polarized monolayer was counterstained with wheat germ agglutinin



(WGA) Alexa Fluor 594 Conjugate (Thermo-Fisher Scientific) to illuminate the cytoplasm for contrasting to show that crystals are internalized inside the cells in **E**. Control (Control + WGA), **F**. CaP (CaP + WGA), **G**. CaOx (CaOx + WGA), **H**. Mixed (Mixed + WGA) crystal internalization conditions. Black arrows indicate internalized crystals. Scale bars = 20  $\mu\text{m}$ .

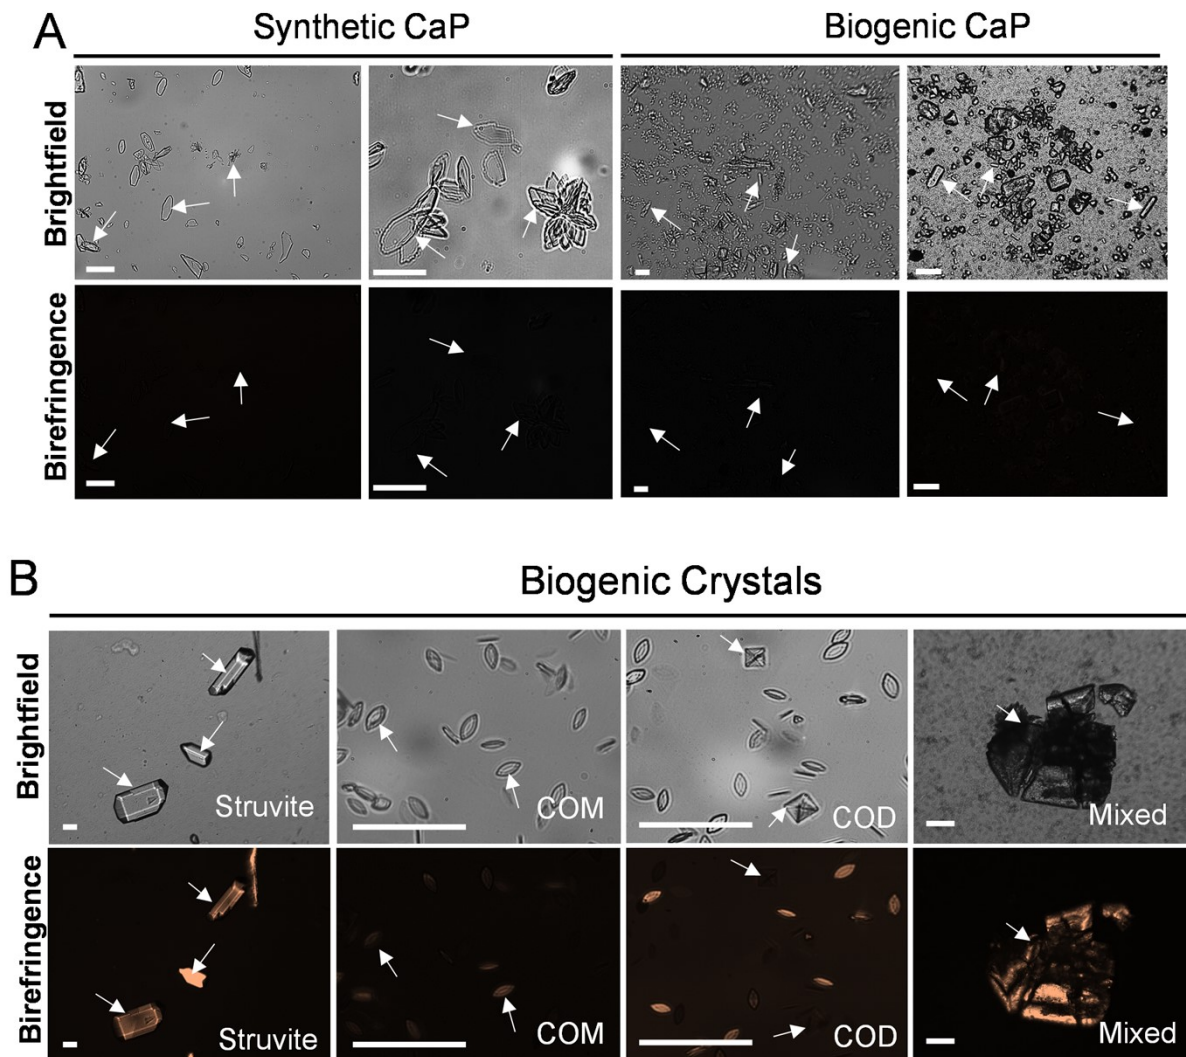

**Figure S4. A.** Brightfield and birefringence images of synthetic and biogenic calcium phosphate (CaP) crystals were captured. Brushite crystals were identified with white arrows in **A**. **B.** Struvite, calcium oxalate monohydrate (COM), calcium oxalate dehydrates (COD), and mixed crystal images were captured and identified with white arrows, respectively in **B**. Biogenic CaP, COM,

COD, and Mixed crystal images were obtained from biogenic urine crystals of TRPC3<sup>-/-</sup> mice treated with CaG. Biogenic struvite crystal images were taken from urine crystals of TRPC3<sup>-/-</sup> mice treated with 0.08% acetazolamide orally for 4 weeks. Scale bars=12.5  $\mu$ m.
